# Supplementary material for: Incorporation of PEG Diacrylates (PEGDA) Generates Hybrid Fmoc-FF Hydrogel Matrices
Source: MDPI journal article supplement (doi:10.3390/gels8120831), 2022-12-16
Supplement: s1 [file s1]

## Supporting Information

### **Incorporation of PEG diacrylates (PEGDA) generates hybrid Fmoc-FF matrices.**

Elisabetta Rosa,<sup>[a],‡</sup> Enrico Gallo,<sup>[b],‡</sup> Teresa Sibillano,<sup>[c]</sup> Cinzia Giannini,<sup>[c]</sup> Serena Rizzuti,<sup>[d]</sup> Eliana Gianolio,<sup>[d]</sup> Pasqualina Liana Scognamiglio,<sup>[e]</sup> Giancarlo Morelli,<sup>[a]</sup> Antonella Accardo,<sup>[a]</sup> Carlo Diaferia<sup>[a],\*</sup>

<sup>[a]</sup>Department of Pharmacy, Research Centre on Bioactive Peptides (CIRPeB), University of Naples “Federico II”, Via Montesano 49, 80131 Naples (Italy)

<sup>[b]</sup>IRCCS Synlab SDN, Via E. Gianturco 113, 80143, Naples (Italy)

<sup>[c]</sup>Institute of Crystallography (IC), CNR, Via Amendola 122, 70126 Bari (Italy)

<sup>[d]</sup>Department of Molecular Biotechnologies and Health Science, University of Turin, Via Nizza 52, 10125, Turin (Italy)

<sup>[e]</sup> Department of Sciences, University of Basilicata, Via dell’Ateneo Lucano 10, 85100, Potenza, (Italy)

<sup>‡</sup>*These authors contributed equally*

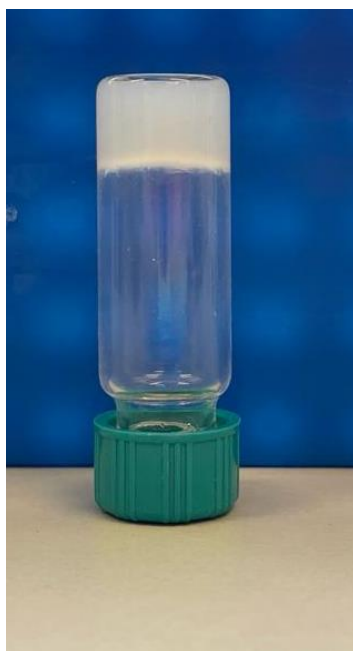

**Figure S1:** Self-supporting hydrogel of Fmoc-FF/PEGDA1 1/50 *mol/mol* ratio.

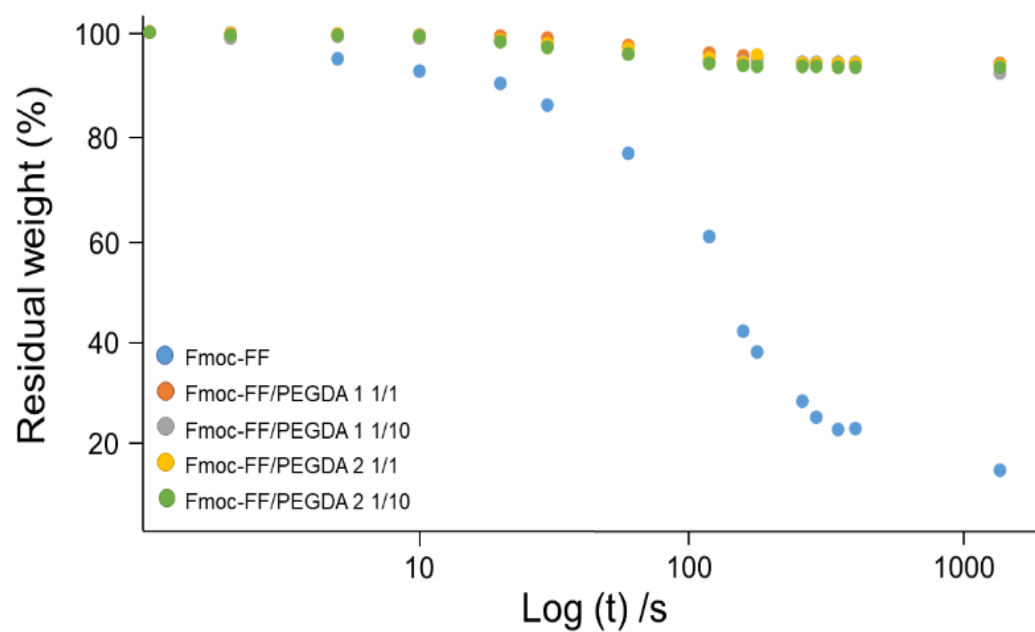

**Figure S2:** Water retention curve of mixed Fmoc-FF/PEGDA hydrogels.

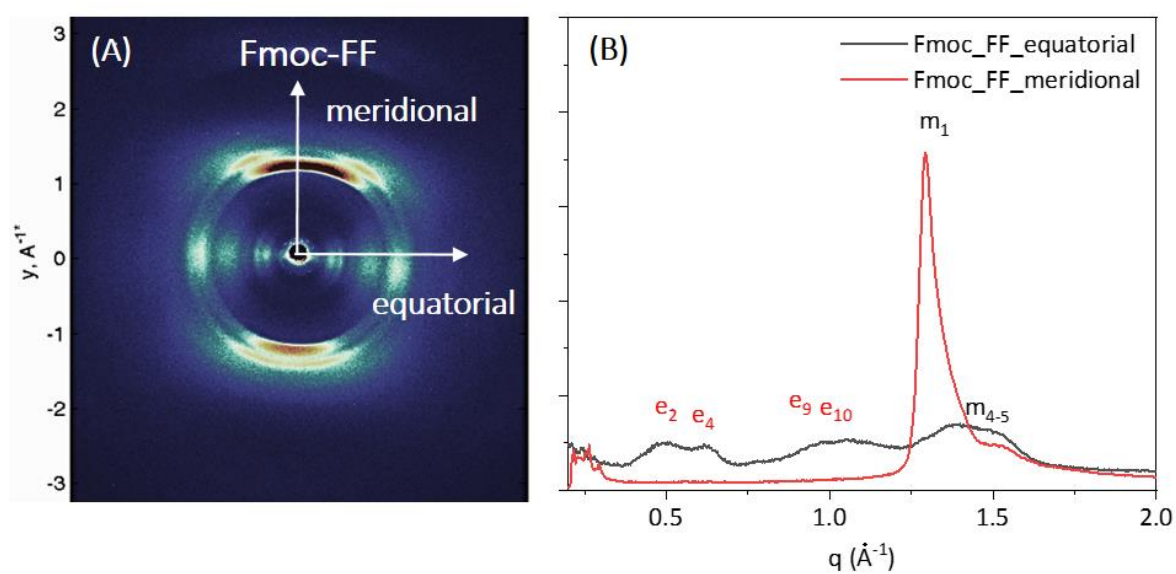

**Figure S3:** WAXS characterization of the mixed hydrogels Fmoc-FF: 2D WAXS data (on the left), and 1D WAXS meridional/equatorial profiles (on the right).

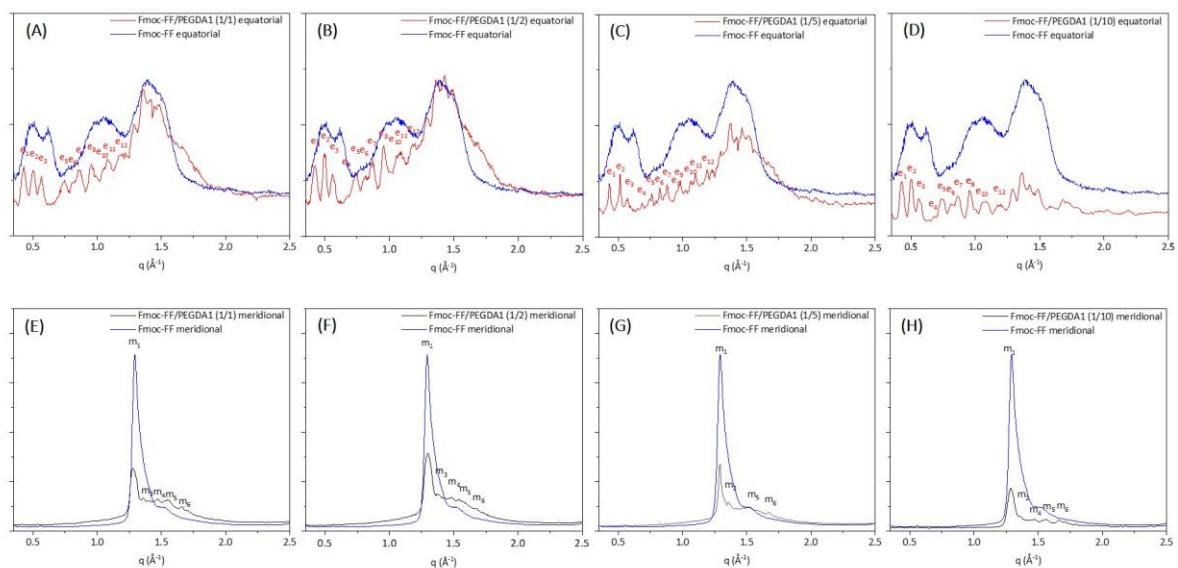

**Figure S4:** Superimposition of 1D WAXS equatorial (A, B, C, D) and meridional (E, F, G, H) profiles for Fmoc-FF HG and PEGDA1 based HGs at the studied molar ratio.

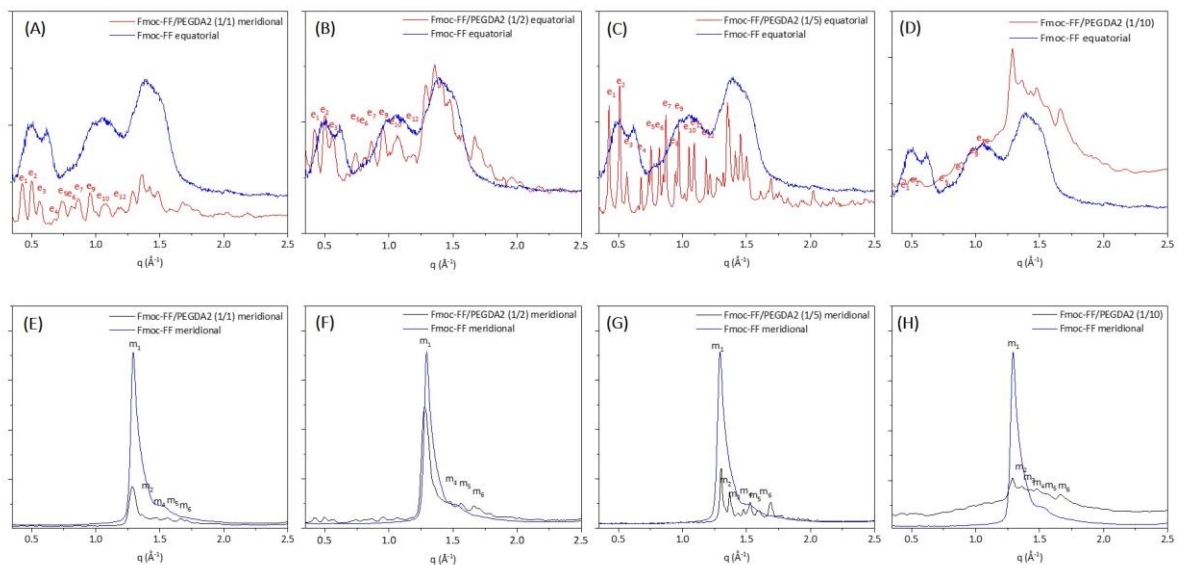

**Figure S5:** Superimposition of 1D WAXS equatorial (A, B, C, D) and meridional (E, F, G, H) profiles for Fmoc-FF HG and PEGDA2 based HGs at the studied molar ratio.

PEGDA1 1/1

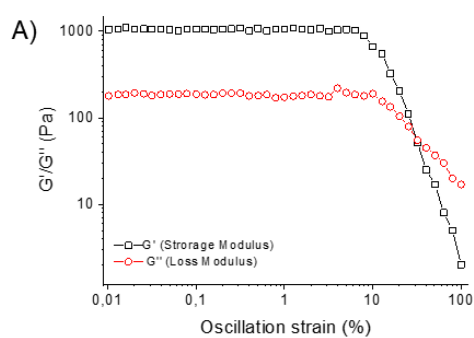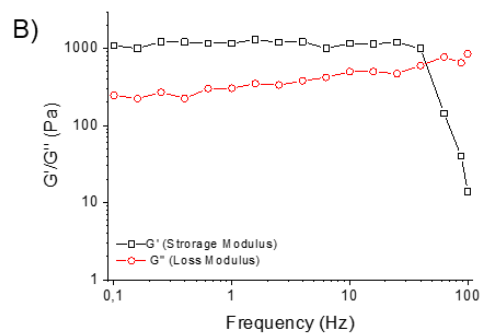

PEGDA1 1/10

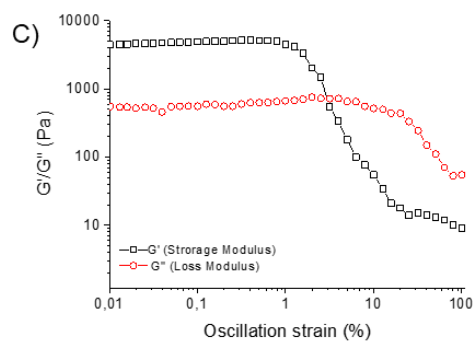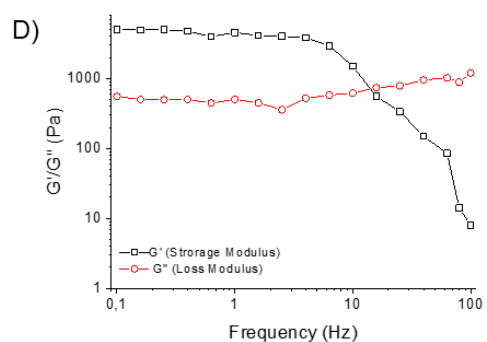

**Figure S6:** Oscillation time sweeps tests for PEGDA1 1/1 (A) and PEGDA1 1/10 (C); frequency time sweeps tests for PEGDA1 1/1 (B) and PEGDA1 1/10 (D).

PEGDA2 1/1

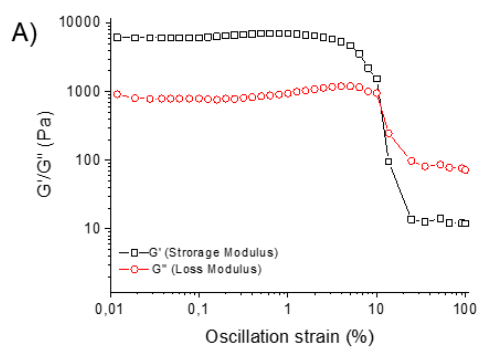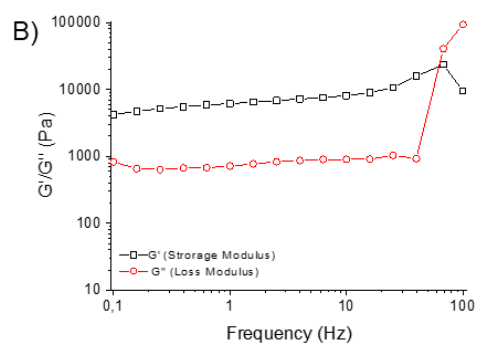

PEGDA2 1/10

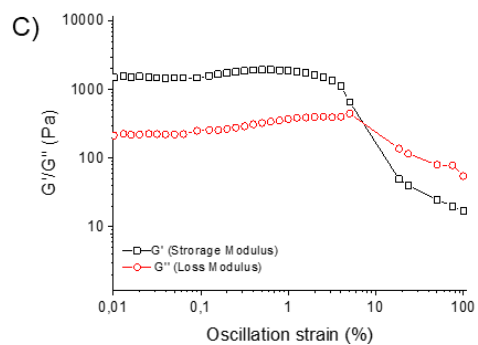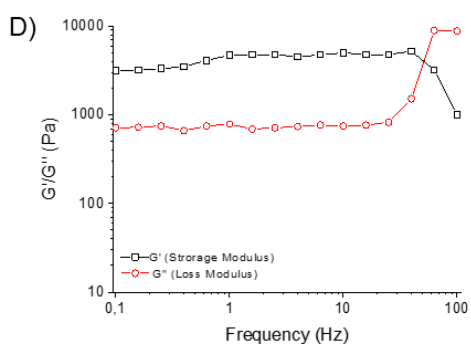

**Figure S7:** Oscillation time sweeps tests for PEGDA2 1/1 (A) and PEGDA2 1/10 (C); frequency time sweeps tests for PEGDA2 1/1 (B) and PEGDA2 1/10 (D).



**Table S1:** Meridional and equatorial peak positions in  $q$  ( $\text{\AA}^{-1}$ ) and corresponding distance  $d = 2\pi/q$  ( $\text{\AA}$ ) of the mixed hydrogels; in red the common peak with the Fmoc-FF reference fiber.

| Reflections       | $q$ [ $\text{\AA}^{-1}$ ] $\pm 0.02$ | $d$ [ $\text{\AA}$ ] $\pm 0.5$   |
|-------------------|--------------------------------------|----------------------------------|
| <b>Equatorial</b> | $e_1 = 0.42$                         | $d_{e1}=14.96$                   |
|                   | <b><math>e_2 = 0.50</math></b>       | <b><math>d_{e2}=12.57</math></b> |
|                   | $e_3 = 0.56$                         | $d_{e3}=11.22$                   |
|                   | <b><math>e_4 = 0.65</math></b>       | <b><math>d_{e4}=9.67</math></b>  |
|                   | $e_5 = 0.74$                         | $d_{e5}=8.49$                    |
|                   | $e_6 = 0.81$                         | $d_{e6}=7.76$                    |
|                   | $e_7 = 0.87$                         | $d_{e7}=7.22$                    |
|                   | $e_8 = 0.94$                         | $d_{e8}=6.68$                    |
|                   | <b><math>e_9 = 0.97</math></b>       | <b><math>d_{e9}=6.48</math></b>  |
|                   | <b><math>e_{10} = 1.05</math></b>    | <b><math>d_{e10}=5.98</math></b> |
|                   | $e_{11} = 1.09$                      | $d_{e11}=5.76$                   |
|                   | $e_{12} = 1.18$                      | $d_{e12}=5.32$                   |
|                   |                                      |                                  |
| <b>Meridional</b> | <b><math>m_1 = 1.29</math></b>       | <b><math>d_{m1}=4.91</math></b>  |
|                   | $m_2 = 1.32$                         | $d_{m2}=4.76$                    |
|                   | $m_3 = 1.42$                         | $d_{m3}=4.42$                    |
|                   | <b><math>m_4 = 1.46</math></b>       | <b><math>d_{m4}=4.30</math></b>  |
|                   | <b><math>m_5 = 1.54</math></b>       | <b><math>d_{m5}=4.08</math></b>  |
|                   | $m_6 = 1.62$                         | $d_{m6}=3.88$                    |
